# Supplementary material
Source: PubMed Central journal article supplement (PMC5732570)

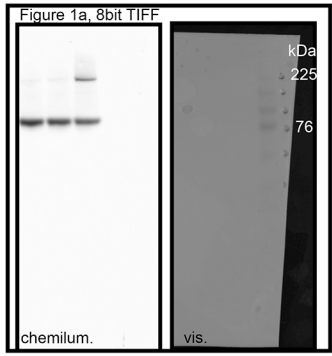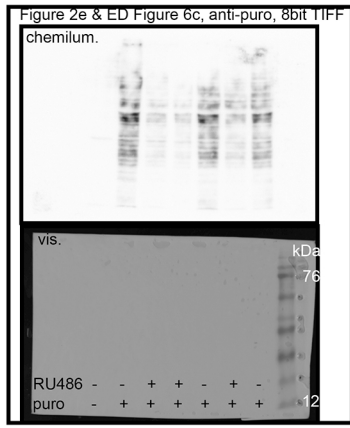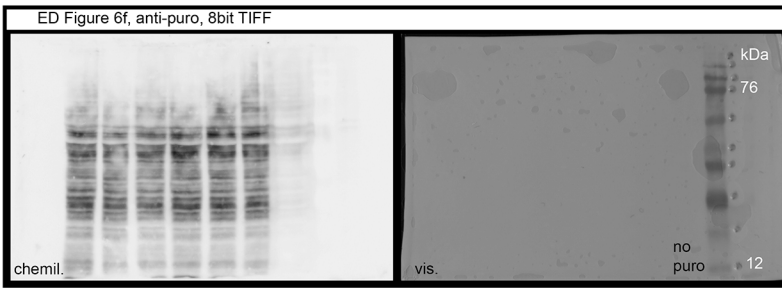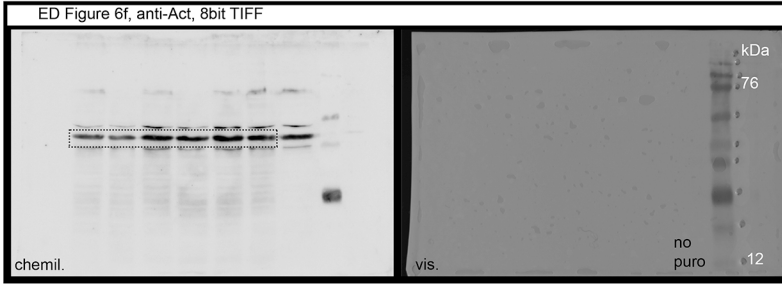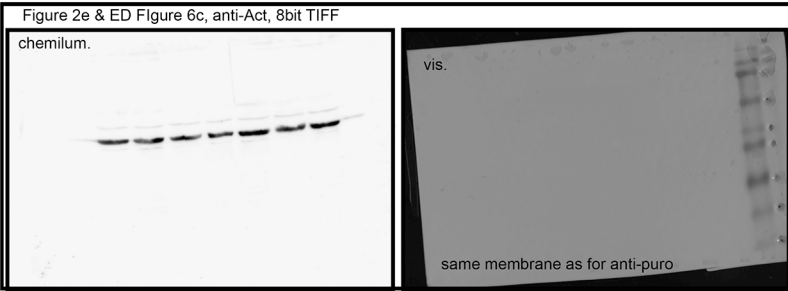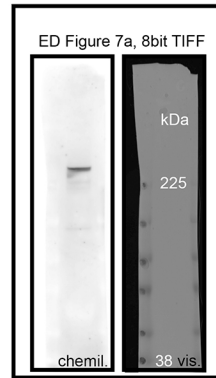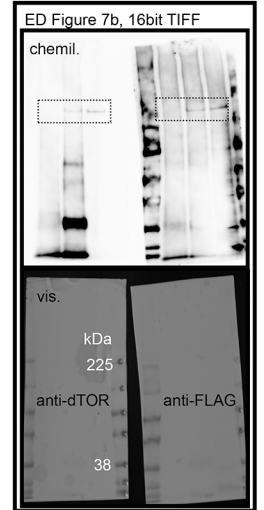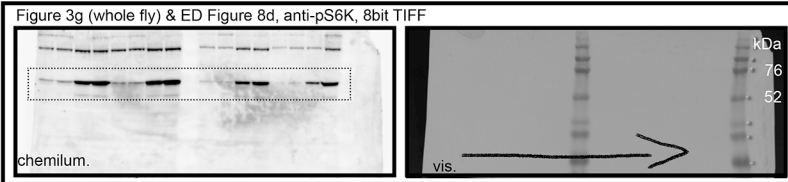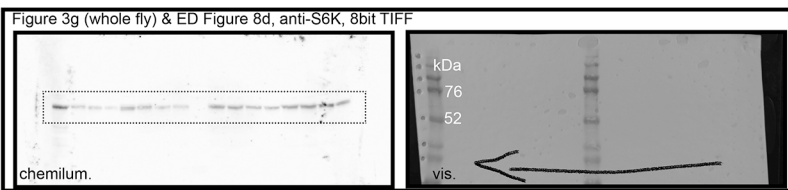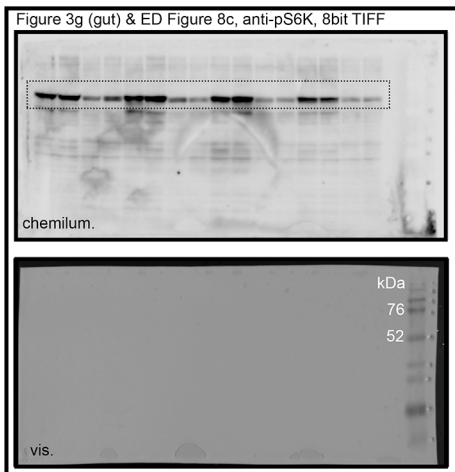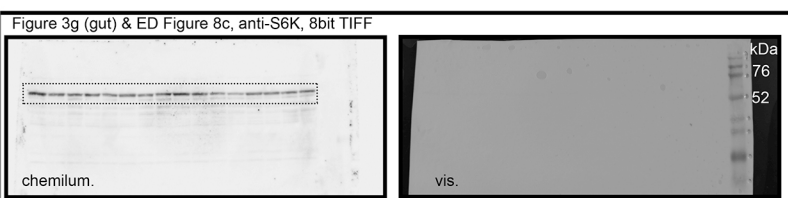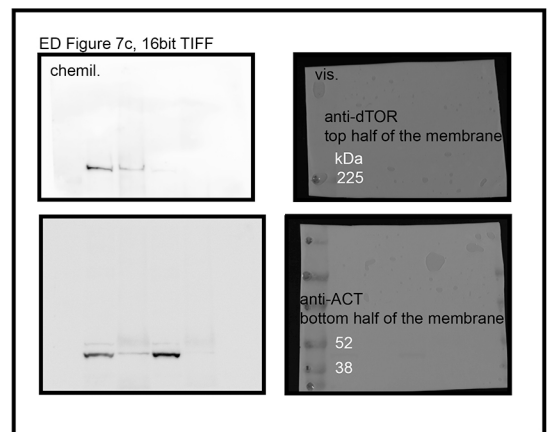

Supplement: NIHMS74851-supplement-Supplementary_figure_1.pdf [file NIHMS74851-supplement-Supplementary_figure_1.pdf]
